# Supplementary material
Source: PubMed Central journal article supplement (PMC307668)

1 2 3 4

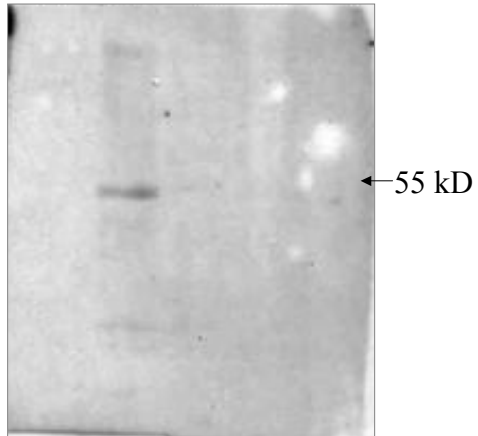

Supplement: pnas_100_26_15918__2.pdf [file pnas_100_26_15918__2.pdf]

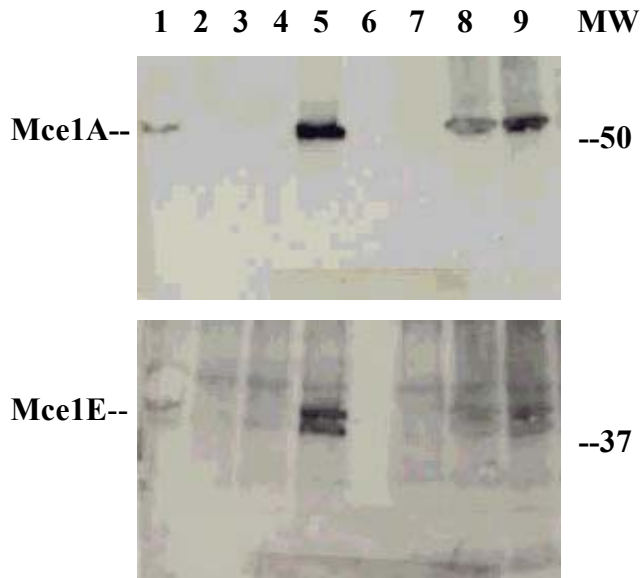

Supplement: pnas_100_26_15918__6.pdf [file pnas_100_26_15918__6.pdf]

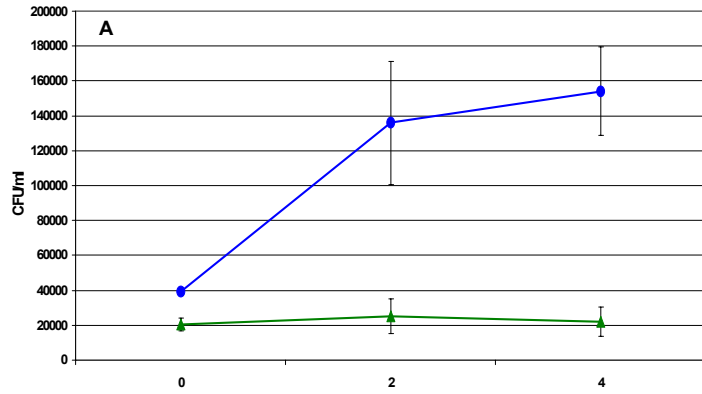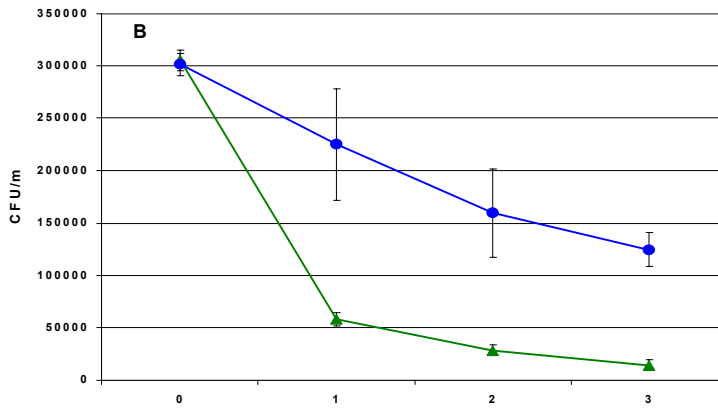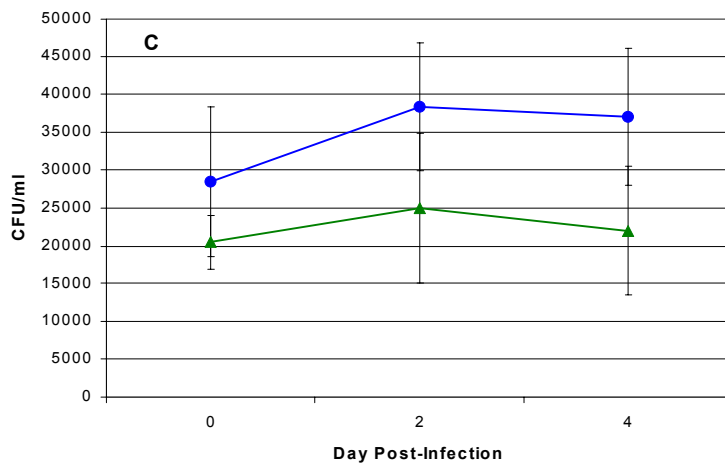

Supplement: pnas_100_26_15918__8.pdf [file pnas_100_26_15918__8.pdf]
